# Supplementary material
Source: publisher figshare collection journal article supplement (https://karger.figshare.com/ndownloader/files/20219937)
Supplement: Supplementary file 1 [file 20219937]

**SUPPLEMENTAL MATERIAL**

**Risk stratification for ischemic cerebrovascular events and mortality among intracerebral haemorrhage patients with and without atrial fibrillation: a cohort study**

Peter Brønnum Nielsen1,4 MSc, PhD

Thure Filskov Overvad1,2 MD, PhD

Søren Due Andersen1,3 MD, PhD

Torben Bjerregaard Larsen1,4 MD, PhD

Flemming Skjøth1,6 MSc, PhD

Mette Søgaard1,4 DVM, PhD

Gregory Y. H. Lip1,4 MD

List of contents:

**Online Table I:** Definitions on comorbidity and concomitant medication according to ICD-10 codes and ATC-codes.

**Online Figure I:** Receiver Operating Curves (ROC) for CHA2DS2-VASc score level and associated outcome

**Online Table I:** Definitions on comorbidity, outcome, and concomitant medication according to ICD-10 codes and ATC-codes.

|  | International Classification of Diseases 10th revision (ICD-10) code | Anatomical Therapeutic Chemical (ATC) code |
| --- | --- | --- |
| Condition |  |  |
| Congestive heart failure | I11.0; I13.0; I13.2; I42.0; I50 | CO3C |
| Left ventricular dysfunction | I50.1; I50.9 |  |
| Hypertension |  | See specified definition* |
| Diabetes mellitus | E10.0; E10.1; E10.9; E11.0; E11.1; E11.9 | A10 |
| Ischemic stroke** | I63; I64 |  |
| Systemic embolism | I74 |  |
| Transient ischemic disease** | G45 |  |
| Aortic plaque | I70.0 |  |
| Peripheral arterial disease | I70.2-I70.9; I71; I73.9; I74 |  |
| Myocardial infarction | I21-I23 |  |
| Abnormal renal function | I12; I13; N00-N05; N07; N11; N14; N17-N19; Q61 |  |
| Prior Bleeding | I60-I62; D62; J94.2; H11.3; H35.6; H43.1; N02; N95; R04; R31; R58; K25.0; K26.0; K27.0; K28.0; K29.0; S06.3C; S06.4; S06.5; S06.6 |  |
| Atrial fibrillation | I48 |  |
| Intracranial bleeding** | I61 |  |
| Medication |  |  |
| Dabigatran  Rivaroxaban  Apixaban |  | B01AE07  B01AE07  B01AF02 |
| Coumarin derivatives |  | B01AA |
| Aspirin |  | B01AC06 |
| Beta-blockers  Calcium channel blockers  Renin-angiotensin system  inhibitors (ACEi/ARBs)  Loop diuretics  Statin |  | C07  C07F; C08; C09BB; C09DB  C09  C03C  C10 |
| Selective serotonin reuptake inhibitors |  | N06AB |

* We identified subjects with hypertension from combination treatment with at least two of the following classes of antihypertensive Drugs:

I. Alpha adrenergic blockers (C02A, C02B, C02C)

II. Non-loop diuretics (C02DA, C02L, C03A, C03B, C03D, C03E, C03X, C07C, C07D, C08G, C09BA, C09DA, C09XA52)

III. Vasodilators (C02DB, C02DD, C02DG, C04, C05)

IV. Beta blockers (C07)

V. Calcium channel blockers (C07F, C08, C09BB, C09DB)

VI. Renin-angiotensin system inhibitors (C09).

** Determined from the Danish Stroke Registry

**Online Figure 1:** Receiver Operating Curves (ROC) for CHA2DS2-VASc score level and associated outcome

**Atrial fibrillation**


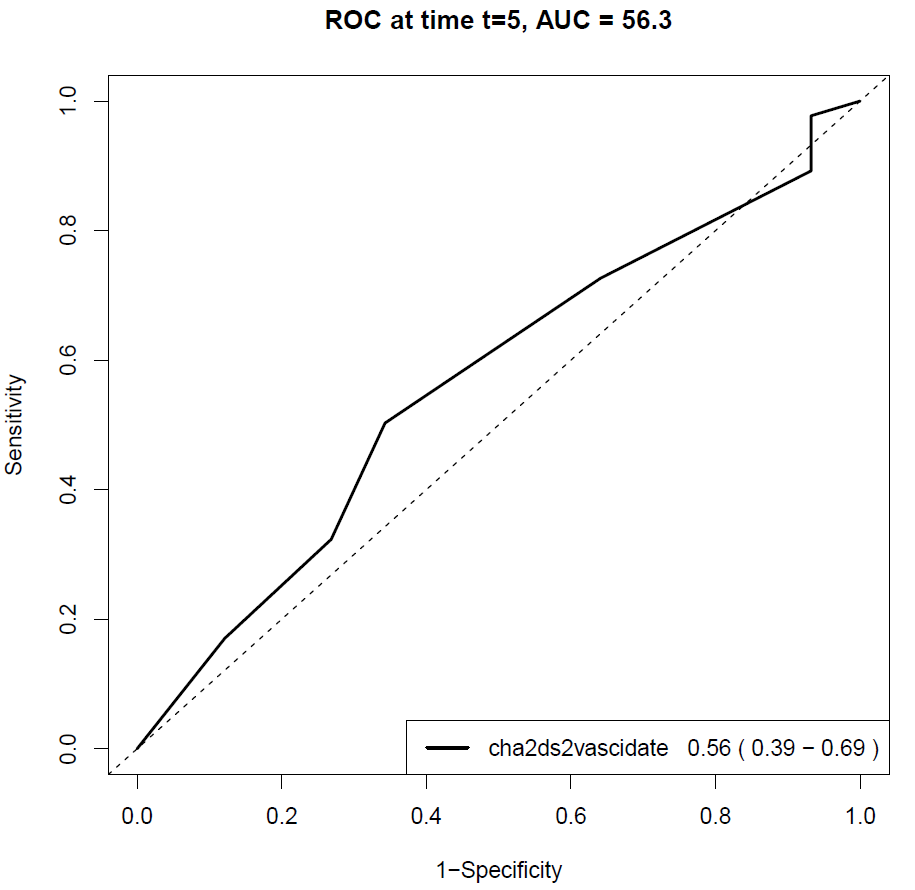


**No atrial fibrillation**

**
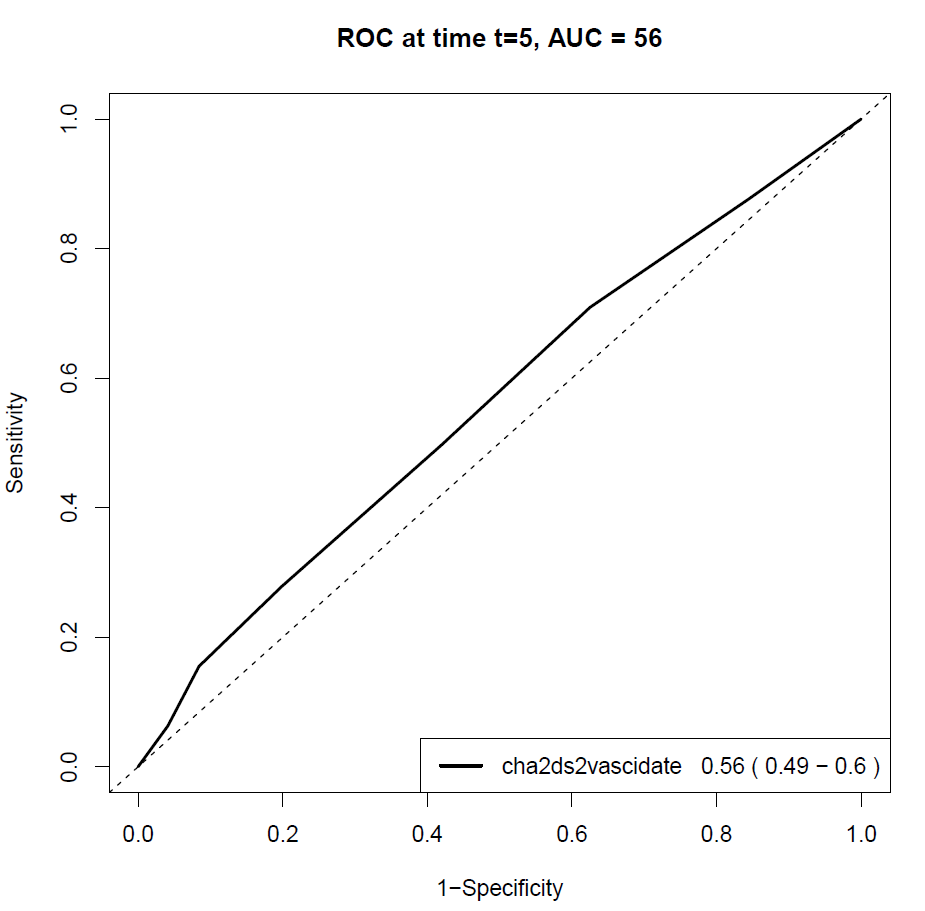
**
